# Supplementary material
Source: ML conference proceedings conference paper supplement (https://openreview.net/forum?id=wblxm5zdkE)

Method II-COS SAST CP

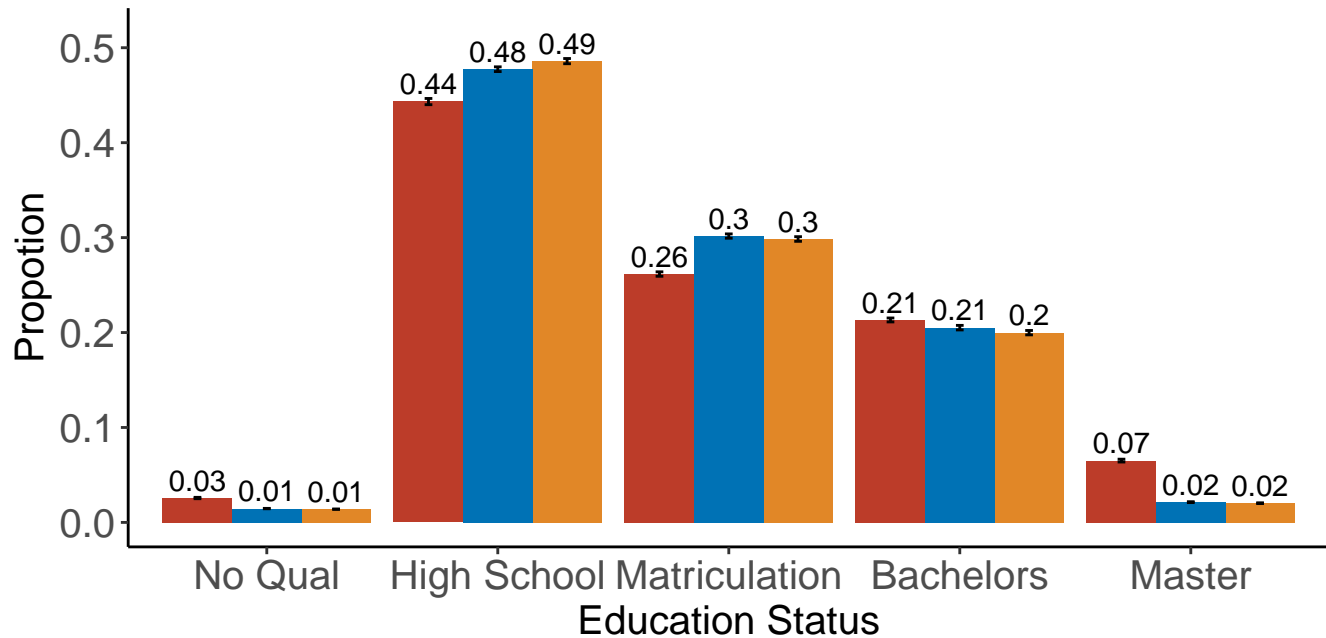

Supplement: supplementary_material [file attachment]

Method ■ II-COS ■ SAST

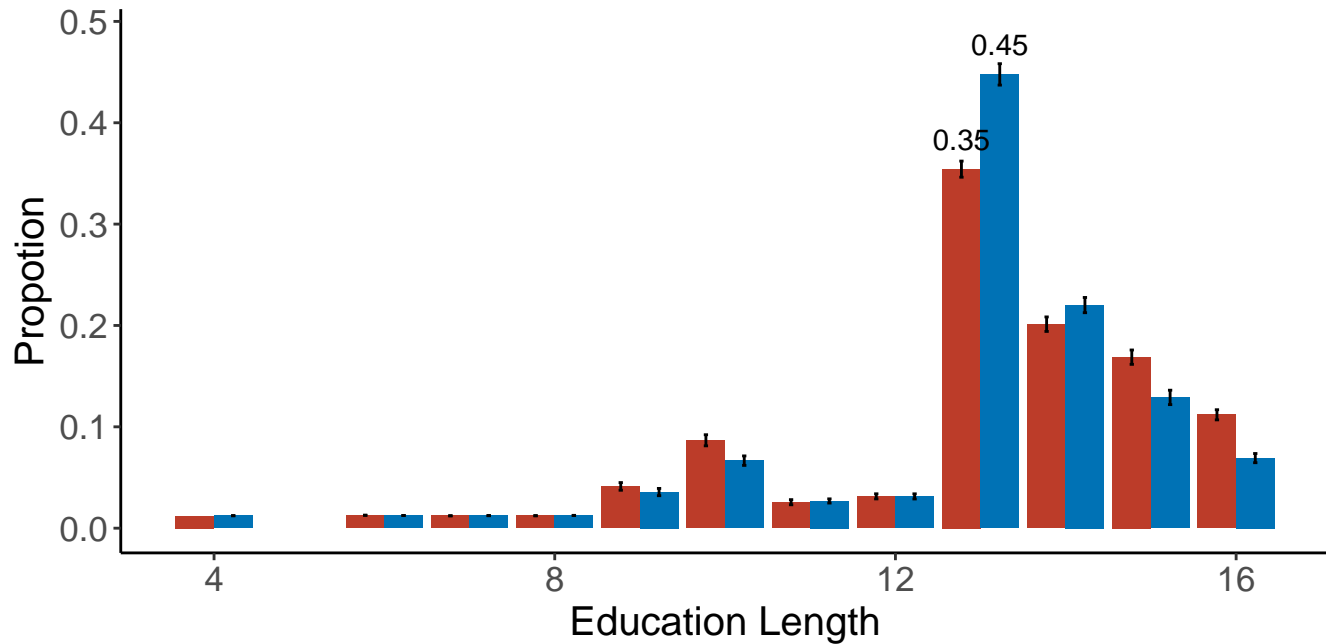

Supplement: supplementary_material [file attachment]
